# Supplementary material
Source: PubMed Central journal article supplement (PMC4186906)
Supplement: NIHMS620070-supplement-supplement_1.pdf [file NIHMS620070-supplement-supplement_1.pdf]

**SUPPLEMENTARY TABLE Ia: Individual characteristics at time of diagnosis of SCID for patients undergoing URD HCT**

| Case #            | Gender | Age (Days) | Race / Ethnicity | ALC                    | CD3 | CD4 | CD8 | B Cells | NK  | PHA | IgG     | IgM | IgA | TME | Diagnostic Trigger                 | Mutation                                             |
|-------------------|--------|------------|------------------|------------------------|-----|-----|-----|---------|-----|-----|---------|-----|-----|-----|------------------------------------|------------------------------------------------------|
|                   |        |            |                  | (x 10 <sup>6</sup> /L) |     |     |     |         |     |     | (mg/dL) |     |     |     |                                    |                                                      |
| <b>IL2RG SCID</b> |        |            |                  |                        |     |     |     |         |     |     |         |     |     |     |                                    |                                                      |
| 1                 | M      | 0          | Caucasian        | 620                    | 6   | 4   | 3   | 355     | 26  | NT  | 820     | 0   | 0   | 0%  | Family History                     | c.355delG                                            |
| 2                 | M      | 110        | Caucasian        | 272                    | 253 | 166 | 90  | 5       | 8   | NT  | 520     | 24  | 7   | 0%  | Paraflu3, Lymphoma                 | IVS3-11bp C>G                                        |
| 3                 | M      | 271        | Caucasian        | 1661                   | 124 | 3   | 49  | 1528    | 0   | 2%  | 330     | 67  | 20  | 0%  | PCP                                | c.284 (del2): a--g                                   |
| 4                 | M      | 169        | Caucasian        | 682                    | 6   | 0   | 0   | 613     | 6   | NT  | 400     | 19  | 0   | 0%  | Thrush, PNA, Perianal Abscess      | c.1-3318_594+455del5157                              |
| 5                 | M      | 270        | Caucasian        | 1700                   | 605 | 553 | 52  | 605     | 415 | 10% | 104     | 28  | 0   | 0%  | RSV, PCP                           | c.129(+5) G>A                                        |
| 6                 | M      | 228        | Caucasian        | 300                    | 0   | 0   | 0   | 160     | 100 | NT  | 357     | 36  | 0   | 0%  | PCP, Paraflu, Astro                | 11 bp deletion from intron 4 to first 6 bp of exon 5 |
| 7                 | M      | 25         | Hispanic         | 780                    | 0   | 0   | 0   | 1096    | 45  | 0%  | 320     | 14  | 0   | 0%  | Newborn Screen                     | c.822-840del119                                      |
| 8                 | M      | 426        | Caucasian        | 8200                   | 321 | 89  | 194 | 7786    | 25  | 0%  | 10      | 14  | 0   | 84% | VZV                                | p.Q81X                                               |
| 9                 | M      | 0          | Caucasian        | 847                    | 8   | 0   | 8   | NT      | NT  | NT  | NT      | NT  | NT  | 0%  | Family History                     | NR                                                   |
| 10                | M      | 120        | Caucasian        | 1836                   | 293 | 36  | 110 | 1468    | 73  | 2%  | 400     | 23  | 0   | 25% | Thrush                             | c.640C>T                                             |
| 11                | M      | 274        | Caucasian        | 4914                   | 49  | 9   | 4   | 4766    | 0   | NT  | 80      | 34  | 0   | 0%  | RSV, hMPV, Noro                    | c.509T>C                                             |
| 12                | M      | 185        | Caucasian        | 2100                   | 0   | 0   | 0   | 2000    | 0   | 0%  | NT      | NT  | NT  | 0%  | PCP, RSV                           | NR                                                   |
| 13                | M      | 149        | Caucasian        | 2065                   | 4   | 2   | 6   | 2034    | 64  | 0%  | 93      | 0   | 0   | 0%  | Thrush, FluB                       | delc.772, changing 3' splice site                    |
| 14                | M      | 209        | Caucasian        | 930                    | 37  | 9   | 9   | 893     | NT  | 1%  | 572     | 14  | 7   | NT  | RSV, Paraflu, S. aureus bacteremia | NR                                                   |
| 15                | M      | 97         | Caucasian        | 2900                   | 3   | 2   | 3   | 433     | 8   | 0%  | 576     | 35  | 0   | 0%  | Adeno, Paraflu, Rota               | NR                                                   |
| 16                | M      | 157        | Asian            | 1760                   | 18  | 0   | 0   | 1707    | 0   | NT  | 426     | 36  | 7   | NT  | Thrush, RSV                        | c.633A>T                                             |
| 17                | M      | 328        | Caucasian        | 1100                   | 0   | 0   | 0   | 1090    | 0   | NT  | 330     | 38  | 0   | 0%  | PCP                                | c.268T>C                                             |
| 18                | M      | 0          | Caucasian        | 1970                   | 60  | 10  | 40  | 1520    | 20  | NT  | 801     | 5   | 0   | 0%  | Family History                     | c.822_823delCAinsdup833_845                          |
| 19                | M      | 229        | Caucasian        | 2170                   | 0   | 0   | 0   | 2130    | 20  | NT  | 658     | 0   | 0   | 0%  | PCP                                | c.670C>T                                             |
| 20                | M      | 184        | Caucasian        | 2870                   | 10  | 1   | 1   | 2840    | 3   | NT  | 801     | 21  | 0   | 0%  | PCP                                | c.854G>A                                             |
| 21                | M      | 236        | Caucasian        | 2180                   | 240 | 170 | 70  | 1610    | 220 | 0%  | NT      | NT  | NT  | NT  | PCP                                | c.720G>T                                             |

| Case #            | Gender | Age (Days) | Race / Ethnicity | ALC                    | CD3 | CD4 | CD8 | B Cells | NK   | PHA | IgG     | IgM | IgA | TME  | Diagnostic Trigger    | Mutation              |
|-------------------|--------|------------|------------------|------------------------|-----|-----|-----|---------|------|-----|---------|-----|-----|------|-----------------------|-----------------------|
|                   |        |            |                  | (x 10 <sup>6</sup> /L) |     |     |     |         |      |     | (mg/dL) |     |     |      |                       |                       |
| <b>ADA SCID</b>   |        |            |                  |                        |     |     |     |         |      |     |         |     |     |      |                       |                       |
| 1                 | F      | 200        | Hispanic         | 170                    | 56  | 31  | 22  | 22      | 88   | 0%  | 49      | 0   | 0   | 0%   | PCP, Rota             | p.L107P + p.C262Y     |
| 2                 | F      | 74         | Caucasian        | 200                    | 0   | 0   | 0   | 0       | 0    | NT  | 776     | 5   | 0   | 0%   | RSV                   | NR, Level = 0         |
| 3                 | F      | 30         | Caucasian        | 350                    | 14  | 12  | 3   | 0       | 0    | NT  | 684     | 8   | 0   | 0%   | PCP, Paraflu3         | NR, Level = 0         |
| 4                 | M      | 24         | Caucasian        | 380                    | 9   | 6   | 3   | 2       | 76   | NT  | 280     | 5   | 0   | 0%   | PCP                   | NR, Level = 0         |
| 5                 | F      | 68         | Caucasian        | 60                     | 0   | 0   | 0   | 9       | 28   | 0%  | 200     | 8   | 0   | 0%   | PNA                   | NR, Level = 0         |
| 6                 | M      | 11         | Asian            | 250                    | 5   | 5   | 0   | 3       | 9    | NT  | 840     | 0   | 0   | 0%   | Family History        | c.256-258 ins T       |
| 7                 | F      | 23         | Asian            | 200                    | 4   | 1   | 0   | 2       | 15   | NT  | 370     | 17  | 25  | 0%   | PNA                   | NR, Level = 0         |
| <b>OTHER SCID</b> |        |            |                  |                        |     |     |     |         |      |     |         |     |     |      |                       |                       |
| 1                 | M      | 2          | Caucasian        | 1200                   | 0   | 0   | 0   | 0       | 1200 | NT  | NT      | NT  | NT  | 0%   | Family History        | Unknown               |
| 2                 | M      | 38         | Caucasian        | 1720                   | 17  | 0   | 0   | 860     | 757  | 0%  | 1360    | 47  | 0   | 0%   | PNA                   | Unknown               |
| 3                 | F      | 121        | Caucasian        | 210                    | 0   | 0   | 0   | 0       | 210  | NT  | 120     | NT  | NT  | 0%   | FluA, FTT             | RAG2; c.1643C>T       |
| 4                 | F      | 947        | Caucasian        | 1670                   | 0   | 0   | 0   | 1486    | 167  | 0%  | 0       | 14  | 0   | 0%   | Paraflu3, HHV-6, ALL  | Unknown               |
| 5                 | F      | 302        | Caucasian        | 3267                   | 510 | 421 | 49  | 23      | 699  | NT  | NT      | NT  | NT  | 0%   | PCP, Mycobacteria     | Unknown               |
| 6                 | M      | 5          | Mid. East.       | 400                    | 0   | 0   | 0   | 0       | 390  | NT  | 927     | 0   | 0   | 0%   | Family History -> CMV | Artemis; NR           |
| 7                 | M      | 11         | Mid. East.       | 1200                   | 189 | 101 | 25  | 0       | 781  | 0%  | 131     | 3   | 3   | 100% | Family History        | RAG2; NR              |
| 8                 | M      | 147        | Caucasian        | 660                    | 173 | 120 | 20  | 20      | 445  | 3%  | 41      | 172 | 0   | 0%   | PCP                   | LIG4; compound hetero |
| 9                 | M      | 109        | Caucasian        | 660                    | 30  | 10  | 10  | 550     | 50   | 0%  | NT      | NT  | NT  | NT   | PCP, CMV, Paraflu     | Unknown               |

ADA, adenosine deaminase; ALC, absolute lymphocyte count; NK, Natural Killer; PHA, phytohemagglutinin; TME, transplacental maternal engraftment; PCP, Pneumocystis jiroveci; PNA, pneumonia; VZV, varicella zoster virus; RSV, respiratory syncytial virus; CMV, cytomegalovirus; HHV-6, human herpes virus-6; NT, not tested; NR, not reported

**SUPPLEMENTARY TABLE Ib: Individual HCT characteristics for patients undergoing URD HCT**

| Case #            | Year of HCT | Days from diagnosis | Serotherapy dose (mg/kg) | GVHD Prophylaxis     | Source     | Matching    | TNC (x 10 <sup>8</sup> /kg) | CD34 (x 10 <sup>6</sup> /kg) | CD3 (x 10 <sup>7</sup> /kg) | aGVHD     | cGVHD | 2nd HCT      | Alive | Cause of Death       |
|-------------------|-------------|---------------------|--------------------------|----------------------|------------|-------------|-----------------------------|------------------------------|-----------------------------|-----------|-------|--------------|-------|----------------------|
| <b>IL2RG SCID</b> |             |                     |                          |                      |            |             |                             |                              |                             |           |       |              |       |                      |
| 1                 | 1993        | 46                  | rATG/10                  | CSA / MTX            | BM         | 6/6         | 5.5                         | NT                           | NT                          | Grade II  | N     | N            | Y     |                      |
| 2                 | 1997        | 66                  | None                     | CSA                  | BM         | 6/6         | 7.4                         | 4.4                          | NT                          | Grade II  | N     | N            | Y     |                      |
| 3                 | 2004        | 64                  | rATG/40*                 | CSA / Steroids       | BM         | 10/10       | 5.6                         | 10                           | 4.5                         | Grade II  | N     | N            | Y     |                      |
| 4                 | 2006        | 42                  | None                     | CSA                  | BM         | 10/10       | 3                           | 4.1                          | 4.3                         | Grade II  | NE    | Boost (D+21) | N     | aGVHD (D+103)        |
| 5                 | 2006        | 74                  | rATG/9                   | CSA / Steroids       | BM         | 10/10       | 10                          | NT                           | NT                          | 0         | N     | N            | Y     |                      |
| 6                 | 2008        | 86                  | rATG/10                  | CSA                  | BM         | 12/12       | NT                          | 20                           | NT                          | 0         | N     | N            | Y     |                      |
| 7                 | 2011        | 54                  | rATG/8                   | CSA / MMF            | BM         | 12/12       | 2.9                         | 5.9                          | 72                          | 0         | N     | Boost (D+48) | Y     |                      |
| 8                 | 2012        | 34                  | rATG/10                  | TAC / MTX            | BM         | 10/10       | 4.1                         | 6.1                          | NT                          | 0         | N     | N            | Y     |                      |
| 9                 | 2012        | 47                  | hATG/100                 | TAC                  | BM         | 10/10       | 5.4                         | 8.1                          | NT                          | Grade I   | Y     | Boost (D+40) | Y     |                      |
| 10                | 2003        | 281                 | None                     | CSA                  | PBSC (TCD) | 9/10 (C)    | 1.1                         | 10                           | 10                          | Grade IV  | NE    | N            | N     | aGVHD (D+77)         |
| 11                | 2010        | 60                  | None                     | CSA / MMF            | PBSC (TCD) | 10/10       | 0.1                         | 10                           | 0.02                        | Grade II  | Y     | Full (D+113) | Y     |                      |
| 12                | 2010        | 48                  | None                     | CSA                  | PBSC (TCD) | 10/10       | NT                          | 10                           | 0.01                        | 0         | N     | N            | Y     |                      |
| 13                | 1996        | 155                 | hATG/90                  | CSA / Steroids       | UCB        | 6/6         | 2.6                         | NT                           | NT                          | Grade III | Y     | N            | Y     |                      |
| 14                | 2000        | 43                  | None                     | CSA / Steroids       | UCB        | 6/6         | 1                           | 0.5                          | NT                          | Grade I   | Y     | N            | Y     |                      |
| 15                | 2002        | 28                  | hATG/120                 | CSA                  | UCB        | 6/6         | 0.8                         | 0.9                          | NT                          | 0         | N     | N            | Y     |                      |
| 16                | 2004        | 25                  | None                     | None                 | UCB        | 5/6 (A)     | 2.3                         | 0.1                          | NT                          | Grade II  | Y     | N            | N     | cGVHD (D+362)        |
| 17                | 2008        | 64                  | rATG/10                  | CSA                  | UCB        | 12/12       | 0.4                         | 0.4                          | NT                          | Grade I   | N     | N            | Y     |                      |
| 18                | 2008        | 43                  | None                     | CSA                  | UCB        | 11/12 (DP)  | 1.3                         | 1.7                          | 2.1                         | Grade III | N     | N            | Y     |                      |
| 19                | 2010        | 56                  | None                     | CSA / Steroids       | UCB        | 10/10       | 0.9                         | 0.5                          | 0.4                         | Grade III | Y     | N            | Y     |                      |
| 20                | 2010        | 78                  | None                     | CSA / MMF / Steroids | UCB        | 10/10       | 0.8                         | 0.3                          | 0.4                         | Grade II  | Y     | N            | Y     |                      |
| 21                | 2011        | 74                  | None                     | CSA / MMF / Steroids | UCB        | 8/10 (A+DQ) | 1.1                         | 0.3                          | 0.1                         | 0         | NE    | N            | N     | Ongoing Neuro (D+39) |

| Case #            | Year of HCT | Days from diagnosis | Serotherapy dose (mg/kg) | GVHD Prophylaxis | Source | Matching | TNC                     | CD34                    | CD3                     | aGVHD     | cGVHD | 2nd HCT      | Alive | Cause of Death              |
|-------------------|-------------|---------------------|--------------------------|------------------|--------|----------|-------------------------|-------------------------|-------------------------|-----------|-------|--------------|-------|-----------------------------|
|                   |             |                     |                          |                  |        |          | (x 10 <sup>8</sup> /kg) | (x 10 <sup>6</sup> /kg) | (x 10 <sup>7</sup> /kg) |           |       |              |       |                             |
| <b>ADA SCID</b>   |             |                     |                          |                  |        |          |                         |                         |                         |           |       |              |       |                             |
| 1                 | 2011        | 530^                | rATG/8                   | CSA / MMF        | BM     | 12/12    | 4                       | 2.5                     | 46                      | Grade I   | Y     | N            | Y     |                             |
| 2                 | 2000        | 20                  | None                     | CSA              | UCB    | 6/6      | 1.3                     | 0.7                     | 6.3                     | 0         | N     | N            | Y     |                             |
| 3                 | 2002        | 40                  | None                     | CSA / Steroids   | UCB    | 6/6      | 2                       | 0.6                     | NT                      | Grade III | N     | N            | N     | Ongoing Paraflu (D+166)     |
| 4                 | 2002        | 16                  | None                     | CSA              | UCB    | 6/6      | 1.3                     | 0.4                     | NT                      | 0         | N     | N            | Y     |                             |
| 5                 | 2006        | 31                  | None                     | CSA / Steroids   | UCB    | 10/10    | 1.6                     | 0.5                     | 6.3                     | Grade III | NE    | N            | N     | Ongoing Neuro (D+101)       |
| 6                 | 2010        | 32                  | None                     | CSA / MMF        | UCB    | 10/10    | 3                       | 1                       | 9.2                     | Grade II  | N     | N            | Y     |                             |
| 7                 | 2011        | 62^                 | None                     | CSA / MMF        | UCB    | 10/10    | 2.4                     | 0.9                     | 6.2                     | 0         | N     | N            | Y     |                             |
| <b>OTHER SCID</b> |             |                     |                          |                  |        |          |                         |                         |                         |           |       |              |       |                             |
| 1                 | 1995        | 67                  | None                     | CSA              | BM     | 6/6      | 4                       | NT                      | NT                      | Grade I   | Y     | N            | N     | cGVHD, AIHA, ITP (D+1024)   |
| 2                 | 1998        | 100                 | None                     | CSA              | BM     | 6/6      | NT                      | 14                      | 15.5                    | 0         | NE    | N            | N     | IntraOp (D+71)              |
| 3                 | 2005        | 96                  | Campath/1                | CSA / MTX        | BM     | 10/10    | 3.3                     | 3.7                     | NT                      | 0         | NE    | Full (D+90)  | Y     |                             |
| 4                 | 2009        | 49                  | None                     | CSA / MTX        | BM     | 12/12    | 6.4                     | 7                       | 3.5                     | Grade II  | N     | N            | Y     |                             |
| 5                 | 2011        | 44                  | None                     | TAC              | BM     | 10/10    | 2                       | 4.2                     | 3.4                     | Grade III | Y     | N            | Y     |                             |
| 6                 | 2012        | 111                 | None                     | CSA              | BM     | 10/10    | 9                       | 6.8                     | NT                      | Grade III | Y     | N            | N     | cGVHD, RSV (D+145)          |
| 7                 | 1998        | 55                  | rATG/20                  | CSA / MTX        | UCB    | 6/6      | 1.5                     | NT                      | NT                      | NE        | NE    | Full (D+241) | Y     |                             |
| 8                 | 2007        | 33                  | Campath/1                | CSA              | UCB    | 5/6 (A)  | 1.3                     | 0.4                     | NT                      | NE        | NE    | Full (D+139) | Y     |                             |
| 9                 | 2010        | 16                  | None                     | CSA / Steroids   | UCB    | 10/10    | 0.6                     | 0.2                     | 0.9                     | NE        | NE    | N            | N     | Ongoing Resp. Failure (D+9) |

^PEG-ADA pre-HCT; TNC, total nucleated cell; rATG, rabbit antithymocyte globulin; hATG, horse ATG; \*Fresenius; CSA, cyclosporine; MTX, methotrexate; MMF, mycophenolate mofetil; TAC, tacrolimus; BM, bone marrow; PBSC, peripheral blood stem cells; TCD; T cell depletion; UCB, umbilical cord blood; AIHA, autoimmune hemolytic anemia; ITP, idiopathic thrombocytopenic purpura; RSV, respiratory syncytial virus; NE, not evaluable

**SUPPLEMENTARY TABLE Ic: Individual immunologic data at 1 year post URD HCT**

| Case #            | ALC                    | CD3               | CD4               | CD8               | B cells          | NK Cells          | CD4 /<br>CD45RA  | PHA              | IgG               | IgM              | IgA              | On IG           |
|-------------------|------------------------|-------------------|-------------------|-------------------|------------------|-------------------|------------------|------------------|-------------------|------------------|------------------|-----------------|
|                   | (x 10 <sup>6</sup> /L) |                   |                   |                   |                  |                   |                  |                  | (mg/dL)           |                  |                  |                 |
| <b>IL2RG SCID</b> |                        |                   |                   |                   |                  |                   |                  |                  |                   |                  |                  |                 |
| 1                 | 5916                   | 4673              | 2839              | 1656              | 946              | 297               | 9%               | 100%             | NT                | 8                | 53               | Y               |
| 2                 | 3365                   | 3161              | 1632              | 1394              | 68               | 136               | NT               | NT               | 671               | 85               | 0                | Y               |
| 3                 | 3354                   | 3250              | 940               | 2350              | 0                | 40                | NT               | 100%             | 573               | 50               | 7                | Y               |
| 5                 | 1820                   | 839               | 401               | 201               | 912              | 36                | 70%              | 100%             | NT                | NT               | NT               | Y               |
| 6                 | 4000                   | 3520              | 2310              | 930               | 330              | 140               | 57%              | NT               | 373               | 34               | 0                | Y               |
| 7                 | 2960                   | 2516              | 1362              | 770               | 397              | 0                 | 94%              | 100%             | 870               | 31               | 9                | Y               |
| 8                 | 6300                   | 2604              | 1241              | 1250              | 3602             | 120               | 57%              | 69%              | 482               | 31               | 7                | Y               |
| 9                 | 1031                   | 979               | 381               | 526               | 0                | 0                 | NT               | 75%              | NT                | 0                | 0                | Y               |
| <b><i>11</i></b>  | <b><i>2832</i></b>     | <b><i>NT</i></b>  | <b><i>NT</i></b>  | <b><i>NT</i></b>  | <b><i>NT</i></b> | <b><i>NT</i></b>  | <b><i>NT</i></b> | <b><i>NT</i></b> | <b><i>NT</i></b>  | <b><i>NT</i></b> | <b><i>NT</i></b> | <b><i>N</i></b> |
| 12                | 5388                   | 2186              | 3027              | 1460              | 1460             | 99                | 68%              | NT               | 540               | 60               | 18               | Y               |
| 13                | 337                    | 66                | 21                | 45                | 151              | 120               | 50%              | 100%             | 1283              | 253              | 50               | N               |
| 15                | 2600                   | 764               | 402               | 361               | 248              | 52                | 16%              | NT               | 840               | 9                | 0                | Y               |
| 17                | 5100                   | 3910              | 2580              | 1280              | 1150             | 30                | 60%              | NT               | 501               | 37               | 0                | Y               |
| 18                | 2560                   | 2120              | 1410              | 560               | 280              | 80                | 88%              | NT               | 839               | 42               | 45               | Y               |
| 19                | 520                    | 460               | 360               | 60                | 30               | 5                 | 32%              | NT               | 479               | 0                | 10               | Y               |
| 20                | 490                    | 420               | 270               | 80                | 40               | 10                | 24%              | NT               | 929               | 27               | 138              | Y               |
| <b>ADA SCID</b>   |                        |                   |                   |                   |                  |                   |                  |                  |                   |                  |                  |                 |
| 1                 | 2210                   | 2144              | 530               | 1503              | 22               | 44                | 8%               | 72%              | 663               | N/A              | N/A              | Y               |
| 2                 | 830                    | NT                | NT                | NT                | NT               | NT                | NT               | NT               | 301               | 86               | 50               | N               |
| 4                 | 580                    | 540               | 277               | 214               | 28               | 42                | 80%              | NT               | 781               | 29               | 20               | Y               |
| 6                 | 640                    | 551               | 309               | 192               | 0                | 78                | 55%              | 100%             | 410               | 40               | 0                | Y               |
| 7                 | 636                    | 593               | 272               | 199               | 30               | 10                | NT               | NT               | 950               | 14               | 4                | Y               |
| <b>OTHER SCID</b> |                        |                   |                   |                   |                  |                   |                  |                  |                   |                  |                  |                 |
| 1                 | 590                    | 421               | 308               | 189               | 11               | 184               | 19%              | NT               | NT                | NT               | NT               | Y               |
| <b>3</b>          | <b><i>NT</i></b>       | <b><i>NT</i></b>  | <b><i>NT</i></b>  | <b><i>NT</i></b>  | <b><i>NT</i></b> | <b><i>NT</i></b>  | <b><i>NT</i></b> | <b><i>NT</i></b> | <b><i>NT</i></b>  | <b><i>NT</i></b> | <b><i>NT</i></b> | <b><i>Y</i></b> |
| 4                 | 2080                   | 1414              | 853               | 541               | 333              | 291               | NT               | 85%              | NT                | 34               | 35               | Y               |
| 5                 | 4560                   | 3233              | 2221              | 857               | 150              | 251               | 32%              | NT               | 1130              | 46               | 6                | Y               |
| <b>7</b>          | <b><i>1300</i></b>     | <b><i>623</i></b> | <b><i>496</i></b> | <b><i>114</i></b> | <b><i>13</i></b> | <b><i>458</i></b> | <b><i>0%</i></b> | <b><i>NT</i></b> | <b><i>880</i></b> | <b><i>7</i></b>  | <b><i>3</i></b>  | <b><i>Y</i></b> |
| <b>8</b>          | <b><i>520</i></b>      | <b><i>120</i></b> | <b><i>109</i></b> | <b><i>21</i></b>  | <b><i>16</i></b> | <b><i>390</i></b> | <b><i>NT</i></b> | <b><i>3%</i></b> | <b><i>NT</i></b>  | <b><i>NT</i></b> | <b><i>NT</i></b> | <b><i>Y</i></b> |

**Bold Italics: After Conditioned 2nd HCT (Not counted in Table IV)**

ALC, absolute lymphocyte count; NK, natural killer; PHA, phytohemagglutinin; IG, immunoglobulin; NT, not tested

**SUPPLEMENTARY TABLE Id: Individual immunologic data at last follow-up post URD HCT**

| Case #            | ALC                    | CD3       | CD4       | CD8       | B Cells   | NK Cells  | CD4 / CD45RA | PHA       | IgG       | IgM       | IgA       | On IG    | PBMC        | CD3       | B Cell    | Myeloid   | Other Complications                                     |
|-------------------|------------------------|-----------|-----------|-----------|-----------|-----------|--------------|-----------|-----------|-----------|-----------|----------|-------------|-----------|-----------|-----------|---------------------------------------------------------|
|                   | (x 10 <sup>6</sup> /L) |           |           |           |           |           |              |           | (mg/dL)   |           |           |          |             |           |           |           |                                                         |
| <b>IL2RG SCID</b> |                        |           |           |           |           |           |              |           |           |           |           |          |             |           |           |           |                                                         |
| 1                 | 1909                   | 1798      | 355       | 1101      | 111       | 9         | 4%           | 65%       | 643       | 38        | 0         | Y        | NT          | 99%       | 0%        | 0%        | None                                                    |
| 2                 | 2928                   | 2249      | 1059      | 1069      | 400       | 48        | 43%          | 100%      | 8.7       | 88        | 0         | N        | NT          | 100%      | 18%       | 16%       | None                                                    |
| 3                 | 908                    | 742       | 314       | 423       | 139       | 22        | NT           | 100%      | 3820      | 40        | 7         | N        | 28%         | 99%       | 100%      | 12%       | AIHA,<br>AINutropenia,<br>Bacterial infections,<br>HepB |
| 5                 | 1800                   | 919       | 362       | 226       | 804       | 29        | NT           | 100%      | NA        | 124       | 54        | Y        | 4%          | NT        | NT        | NT        | None                                                    |
| 6                 | 1000                   | 315       | 144       | 154       | 70        | 40        | 35%          | 100%      | 429       | 63        | 24        | Y        | 77%         | NT        | NT        | 1%        | None                                                    |
| 7                 | 2960                   | 2516      | 1362      | 770       | 397       | 0         | 94%          | 100%      | 870       | 31        | 9         | Y        | 41%         | 97%       | 9%        | 5%        | None                                                    |
| 8                 | 6300                   | 2604      | 1241      | 1250      | 3602      | 120       | 57%          | 69%       | 482       | 31        | 7         | Y        | NT          | 100%      | NT        | 0%        | None                                                    |
| 9                 | 1031                   | 979       | 381       | 526       | 0         | 0         | NT           | 75%       | NT        | 0         | 0         | Y        | 74%         | NT        | NT        | NT        | FTT                                                     |
| <b>11</b>         | <b>2397</b>            | <b>NT</b> | <b>NT</b> | <b>NT</b> | <b>NT</b> | <b>NT</b> | <b>NT</b>    | <b>NT</b> | <b>NT</b> | <b>NT</b> | <b>NT</b> | <b>N</b> | <b>100%</b> | <b>NT</b> | <b>NT</b> | <b>NT</b> | <b>TTP</b>                                              |
| 12                | 4000                   | 3159      | 1046      | 1853      | 1072      | 0         | 71%          | NT        | 820       | 74        | 65        | Y        | 78%         | 100%      | 2%        | 0%        | None                                                    |
| 13                | 1800                   | 1165      | 502       | 569       | 389       | 194       | NT           | 100%      | 1010      | 135       | 69        | N        | 100%        | 100%      | 100%      | 100%      | None                                                    |
| 14                | 2700                   | 1930      | 1360      | 550       | 460       | NT        | NT           | 74        | NT        | 29        | 7         | Y        | 25%         | NT        | NT        | NT        | None                                                    |
| 15                | 2500                   | 764       | 402       | 361       | 248       | 52        | 16%          | NT        | 1067      | 83        | 0         | Y        | NT          | NT        | 0%        | NT        | None                                                    |
| 17                | 10000                  | 3150      | 1440      | 1540      | 700       | 40        | 35%          | NT        | 482       | 82        | 39        | N        | 71%         | NT        | NT        | 31%       | None                                                    |
| 18                | 5070                   | 4210      | 2330      | 1670      | 710       | 100       | 86%          | 100%      | 832       | 29        | 32        | Y        | NT          | 100%      | 12%       | 0%        | None                                                    |
| 19                | 2890                   | 2310      | 1620      | 580       | 400       | 29        | 77%          | 100%      | NA        | 60        | 0         | Y        | NT          | 100%      | NT        | 0%        | Pneumatisis, NTM<br>bacteremia                          |
| 20                | 1150                   | 1070      | 840       | 80        | 3         | 10        | 8%           | NT        | NA        | 28        | 14        | Y        | NT          | 100%      | NT        | 0%        | Vertebral fractures                                     |

| Case #            | ALC                    | CD3         | CD4         | CD8        | B Cells    | NK Cells   | CD4 / CD45RA | PHA         | IgG         | IgM       | IgA       | On IG    | PBMC        | CD3         | B Cell      | Myeloid     | Other Complications             |
|-------------------|------------------------|-------------|-------------|------------|------------|------------|--------------|-------------|-------------|-----------|-----------|----------|-------------|-------------|-------------|-------------|---------------------------------|
|                   | (x 10 <sup>6</sup> /L) |             |             |            |            |            |              |             | (mg/dL)     |           |           |          |             |             |             |             |                                 |
| <b>ADA SCID</b>   |                        |             |             |            |            |            |              |             |             |           |           |          |             |             |             |             |                                 |
| 1                 | 6140                   | 6017        | 1105        | 4851       | 0          | 61         | 8%           | 72%         | 884         | 22        | 0         | Y        | 6%          | 98%         | 35%         | 1%          | CMV                             |
| 2                 | 1760                   | 1277        | 408         | 650        | 47         | 363        | 4%           | NT          | 610         | 61        | 76        | N        | NT          | NT          | NT          | NT          | Pneumonitis                     |
| 4                 | 1570                   | 1328        | 506         | 613        | 137        | 98         | 8%           | NT          | 730         | 55        | 138       | N        | NT          | 96%         | 91%         | 14%         | Pneumonitis                     |
| 6                 | 1690                   | 1574        | 981         | 353        | 48         | 98         | 41%          | NT          | 870         | 31        | 0         | Y        | NT          | 95%         | NT          | 0%          | Pneumonitis, Nephrotic Syndrome |
| 7                 | 636                    | 593         | 272         | 199        | 30         | 10         | NT           | NT          | 950         | 14        | 4         | Y        | NT          | 100%        | NT          | 0%          | None                            |
| <b>OTHER SCID</b> |                        |             |             |            |            |            |              |             |             |           |           |          |             |             |             |             |                                 |
| <i>3</i>          | <i>2110</i>            | <i>1393</i> | <i>781</i>  | <i>570</i> | <i>338</i> | <i>338</i> | <i>NT</i>    | <i>85%</i>  | <i>NT</i>   | <i>98</i> | <i>66</i> | <i>N</i> | <i>100%</i> | <i>100%</i> | <i>100%</i> | <i>100%</i> | <i>Seizures</i>                 |
| 4                 | 12474                  | 10790       | 6999        | 3443       | 1696       | 274        | 51%          | NT          | 1970        | 21        | 14        | N        | 100%        | 100%        | 100%        | 100%        | None                            |
| 5                 | 525                    | 368         | 247         | 63         | 5          | 84         | 0%           | NT          | NT          | NT        | NT        | Y        | NT          | NT          | NT          | NT          | None                            |
| 7                 | <i>1190</i>            | <i>757</i>  | <i>467</i>  | <i>201</i> | <i>257</i> | <i>127</i> | <i>12%</i>   | <i>NT</i>   | <i>1430</i> | <i>30</i> | <i>88</i> | <i>Y</i> | <i>56%</i>  | <i>NT</i>   | <i>NT</i>   | <i>6%</i>   | <i>None</i>                     |
| 8                 | <i>4360</i>            | <i>2566</i> | <i>1846</i> | <i>634</i> | <i>189</i> | <i>156</i> | <i>75%</i>   | <i>100%</i> | <i>NT</i>   | <i>0</i>  | <i>0</i>  | <i>Y</i> | <i>100%</i> | <i>NT</i>   | <i>NT</i>   | <i>NT</i>   | <i>None</i>                     |

***Bold Italics: After Conditioned 2nd HCT (Not counted in Table IV)***

ALC, absolute lymphocyte count; NK, natural killer; PHA, phytohemagglutinin; IG, immunoglobulin; AIHA, autoimmune hemolytic anemia; AI, autoimmune; FTT, failure to thrive; TTP, thrombotic thrombocytopenic purpura; NTM, non-tuberculous mycobacteria; CMV, cytomegalovirus; NT, not tested

SUPPLEMENTARY TABLE IIa: Individual characteristics at time of diagnosis of SCID for patients undergoing MSD HCT

| Case #                       | Gender | Age (days) | Race / Ethnicity | ALC                    | CD3 | CD4 | CD8 | B Cells | NK Cells | PHA | IgG     | IgM | IgA | TME  | Diagnostic Trigger             | Mutation         |
|------------------------------|--------|------------|------------------|------------------------|-----|-----|-----|---------|----------|-----|---------|-----|-----|------|--------------------------------|------------------|
|                              |        |            |                  | (x 10 <sup>6</sup> /L) |     |     |     |         |          |     | (mg/dL) |     |     |      |                                |                  |
| <b>IL2RG &amp; JAK3 SCID</b> |        |            |                  |                        |     |     |     |         |          |     |         |     |     |      |                                |                  |
| 1                            | M      | 57         | Caucasian        | 1656                   | 34  | 23  | 11  | 1424    | 30       | 2%  | 850     | 0   | 0   | 0%   | Family History                 | p.Glu109         |
| 2                            | M      | 5          | Caucasian        | 800                    | 16  | 16  | 0   | 336     | 24       | NT  | 710     | 80  | 0   | 0%   | Family History                 | c.676C>T         |
| 3                            | M      | 242        | Caucasian        | 2496                   | 20  | 15  | 5   | 2172    | 17       | 0%  | 460     | 0   | 0   | 0%   | Rota                           | NR               |
| 4                            | M      | 0          | Caucasian        | NR                     | 0   | 0   | 0   | NR      | NR       | 0%  | NR      | NR  | NR  | 0%   | Family History                 | NR               |
| 5                            | M      | 90         | Caucasian        | 1530                   | 245 | 15  | 153 | 1193    | 8        | 0%  | NR      | NR  | NR  | +    | HSV, PNA                       | NR               |
| 6                            | M      | 209        | Caucasian        | 930                    | 37  | 9   | 9   | 865     | 0        | 0%  | 572     | 14  | 7   | NT   | RSV, Paraflu, S. aureus sepsis | NR               |
| 7                            | M      | 186        | Caucasian        | 1410                   | 8   | 8   | 0   | 1120    | 20       | 0%  | 362     | 109 | 14  | +    | Skin Abscesses, GVHD           | p.S225R          |
| 8                            | M      | 130        | African          | 1938                   | 504 | 17  | 165 | 1345    | 215      | 11% | 18      | 22  | 116 | +    | Paraflu, GVHD                  | c.691G>A         |
| 9                            | M      | 30         | African          | 2301                   | 449 | 46  | 318 | 1719    | 21       | 2%  | 225     | 0   | 0   | +    | Enterovirus                    | c.269del7        |
| 10                           | M      | 209        | Caucasian        | 1610                   | 0   | 0   | 0   | 1562    | 0        | NT  | NR      | NR  | NR  | 0%   | PNA                            | NR               |
| 11                           | M      | 209        | Caucasian        | NR                     | NR  | NR  | NR  | NR      | NR       | NT  | NR      | NR  | NR  | +    | Paraflu, Thrush                | NR               |
| 12                           | M      | 0          | Caucasian        | 1880                   | 130 | 10  | 150 | 850     | 60       | NT  | NR      | NR  | NR  | 0%   | Family History                 | NR               |
| 13                           | M      | 414        | Hispanic         | 1763                   | 10  | 5   | 5   | 1739    | 14       | 1%  | 7       | 61  | 0   | NT   | Aspergillus, Enterococcus      | c.806del23       |
| 14                           | M      | 158        | Asian            | 1224                   | 12  | 0   | 0   | 1187    | 0        | 0%  | 426     | 36  | 7   | 0%   | RSV, Enterobacter PNA          | c.633A>T         |
| 15                           | M      | 60         | Asian            | 620                    | 0   | 0   | 0   | 560     | 20       | 0%  | NR      | NR  | NR  | 0%   | CMV, Thrush                    | NR               |
| 16                           | M      | 134        | Caribbean        | 3000                   | 650 | 50  | 490 | 1780    | 130      | NT  | 0       | 0   | 0   | 100% | PNA                            | c.215G>A         |
| 17                           | M      | 198        | Caucasian        | 486                    | 13  | 12  | 0   | 361     | 87       | NT  | 40      | 0   | 0   | 0%   | hMPV, Noro                     | c.437T>C         |
| 18                           | M      | 0          | Caucasian        | 726                    | 0   | 0   | 0   | 0       | 30       | NT  | 90      | 0   | 0   | 0%   | Family History                 | NR               |
| 19                           | M      | 0          | Caucasian        | 1067                   | 14  | 11  | 0   | 990     | 53       | NT  | 730     | 18  | 0   | 0%   | Family History                 | Exon 3 IVs3+1G>C |
| 20                           | M      | 162        | Caucasian        | 2784                   | 0   | 0   | 0   | 2728    | 28       | NT  | 790     | 26  | 0   | 0%   | PCP                            | c.545G>A         |
| 21                           | F      | 106        | Caucasian        | 915                    | 146 | 82  | 46  | 613     | 101      | NT  | 0       | 128 | 0   | 0%   | CMV, PCP                       | JAK3; NR         |
| 22                           | F      | 106        | Caucasian        | 1730                   | 13  | 13  | 0   | 1249    | 13       | NT  | 0       | 0   | 0   | 0%   | PCP, Vaccine Polio             | JAK3; NR         |
| 23                           | M      | 202        | Asian            | 3102                   | 40  | 30  | 0   | 3015    | 43       | NT  | 1100    | 0   | 0   | 1%   | PCP, Rota, BCG                 | JAK3; NR         |



| Case #          | Gender | Age (days) | Race / Ethnicity | ALC                    | CD3 | CD4 | CD8 | B Cells | NK Cells | PHA | IgG     | IgM | IgA | TME | Diagnostic Trigger   | Mutation      |
|-----------------|--------|------------|------------------|------------------------|-----|-----|-----|---------|----------|-----|---------|-----|-----|-----|----------------------|---------------|
|                 |        |            |                  | (x 10 <sup>6</sup> /L) |     |     |     |         |          |     | (mg/dL) |     |     |     |                      |               |
| <b>ADA SCID</b> |        |            |                  |                        |     |     |     |         |          |     |         |     |     |     |                      |               |
| 1               | F      | 9          | Asian            | NR                     | NR  | NR  | NR  | NR      | 52       | NT  | NR      | NR  | NR  | 0%  | Family History       | NR            |
| 2               | M      | 30         | Asian            | 350                    | 67  | 4   | 63  | 7       | 147      | 0%  | NR      | NR  | NR  | 0%  |                      | NR            |
| 3               | M      | 34         | Asian            | 200                    | 158 | 134 | 24  | 10      | 26       | NT  | NR      | NR  | NR  | 0%  | PNA                  | NR            |
| 4               | F      | 60         | African          | 410                    | 70  | 33  | 37  | 25      | 45       | 0%  | NR      | NR  | NR  | 0%  |                      | NR            |
| 5               | M      | 30         | Caucasian        | 1540                   | 92  | 15  | 77  | 1201    | 185      | 0%  | NR      | NR  | NR  | 0%  |                      | NR            |
| 6               | M      | 383        | Hispanic         | 300                    | 60  | 10  | 50  | 20      | 10       | 0%  | 406     | 11  | NT  | NT  | Candidemia, PCP, CMV | NR, Level = 0 |
| 7               | M      | 20         | Caucasian        | 30                     | 5   | 5   | 2   | 8       | 9        | 0%  | 381     | 40  | 0   | 0%  | Int. Pneumonitis     | NR, Level = 0 |
| 8               | F      | 0          | Asian            | 170                    | 6   | 4   | 0   | 3       | 132      | 0%  | 332     | 0   | 0   | 0%  | Family History       | NR, Level = 0 |
| 9               | F      | 74         | Caucasian        | 369                    | 4   | 0   | 0   | 15      | 339      | 0%  | 168     | 10  | 0   | 0%  | ParvoB19, H. Flu     | NR, Level = 0 |
| 10              | F      | 63         | Caucasian        | 660                    | 455 | 59  | 172 | 26      | 60       | 0%  | NR      | NR  | NR  | +   |                      | NR            |
| 11              | F      | 48         | Caucasian        | 640                    | 13  | 1   | 5   | 13      | 115      | NT  | NR      | NR  | NR  | 0%  | CMV Pneumonitis      | NR            |
| 12              | F      | 21         | Caucasian        | 110                    | NR  | NR  | NR  | NR      | NR       | NR  | NR      | NR  | NR  | 0%  |                      | NR            |
| 13              | F      | 31         | Caucasian        | 200                    | 10  | 0   | 0   | NT      | NT       | NT  | 417     | 3   | 5   | NT  | Pseudomonas          | NR, Level = 0 |
| 14              | M      | 49         | Middle Eastern   | 378                    | 8   | 2   | 4   | 4       | 102      | NT  | 218     | 7   | 0   | 0%  | RSV, Rota            | c.164_172del9 |
| 15              | M      | 28         | African          | 470                    | 10  | 10  | 0   | 30      | 340      | 0%  | NR      | NR  | NR  | 0%  | Cytopenias, Rash     | NR            |
| 16              | M      | 20         | Asian            | 0                      | 0   | 0   | 0   | 0       | 0        | NT  | NR      | NR  | NR  | 0%  | PNA                  | NR            |
| 17              | M      | 34         | Asian            | NR                     | NR  | NR  | NR  | NR      | NR       | NR  | NR      | NR  | NR  | 0%  | PNA                  | NR, Level = 0 |
| 18              | M      | 490        | Middle Eastern   | NR                     | NR  | NR  | NR  | NR      | NR       | NR  | NR      | NR  | NR  | 0%  | PNA                  | NR, Level = 0 |
| 19              | M      | 88         | Caucasian        | 300                    | 240 | 60  | 170 | 30      | 30       | 0%  | 1570    | 85  | 37  | 0%  | Skin Abscesses       | NR, Level = 0 |
| 20              | F      | 194        | African          | 200                    | 140 | 120 | 40  | 10      | 30       | NT  | NR      | NR  | NR  | 0%  | PNA                  | NR            |
| 21              | F      | 165        | African          | 30                     | 2   | 1   | 5   | 8       | 8        | 0%  | NT      | 0   | 0   | NT  | Paraflu, Rota        | NR, Level = 0 |
| 22              | F      | 122        | Caucasian        | 41                     | 0   | 0   | 0   | 0       | 36       | NT  | 820     | 0   | 0   | 0%  | RSV, BCG             | c.648G>A      |
| 23              | F      | 18         | Caucasian        | 190                    | 12  | 9   | 2   | 4       | 168      | 0%  | NT      | NT  | NT  | 0%  | Int. Pneumonitis     | c.646G>A      |

| Case #            | Gender | Age (days) | Race / Ethnicity | ALC                    | CD3  | CD4  | CD8  | B Cells | NK Cells | PHA | IgG     | IgM | IgA | TME | Diagnostic Trigger         | Mutation                        |
|-------------------|--------|------------|------------------|------------------------|------|------|------|---------|----------|-----|---------|-----|-----|-----|----------------------------|---------------------------------|
|                   |        |            |                  | (x 10 <sup>6</sup> /L) |      |      |      |         |          |     | (mg/dL) |     |     |     |                            |                                 |
| <b>Other SCID</b> |        |            |                  |                        |      |      |      |         |          |     |         |     |     |     |                            |                                 |
| 1                 | M      | 0          | Hispanic         | 147                    | 0    | 0    | 0    | 0       | 144      | 0%  | 170     | 18  | 26  | 0%  | Family History             | Artemis; c.326C>T               |
| 2                 | M      | 0          | Native American  | 500                    | 0    | 0    | 0    | 0       | 500      | 0%  | NT      | NT  | NT  | 0%  | Family History             | Artemis; c.597C>A               |
| 3                 | M      | 76         | Native American  | 2574                   | 283  | 219  | 64   | 52      | 2239     | 0%  | 100     | 0   | 0   | 14% | GVHD                       | Artemis; c.597C>A               |
| 4                 | M      | 367        | Hispanic         | 759                    | 457  | 125  | 332  | 7       | 240      | NT  | 361     | 40  | 284 | +   | Aspergillosis, Pseudomonas | RAG2; c.217C>T                  |
| 5                 | F      | 101        | Asian            | 16054                  | 8076 | 2935 | 5079 | 0       | 7848     | NT  | 0       | 9   | 0   | +   | CMV, ParaFlu3, BCG         | Artemis; NR                     |
| 6                 | M      | 156        | Asian            | 1324                   | 0    | 0    | 0    | 0       | 1324     | 0%  | 89      | 9   | 0   | 0%  | Paraflu3, BCG              | RAG1; c.2146C>T                 |
| 7                 | M      | 147        | Asian            | 1120                   | 4    | 4    | 0    | 2       | 960      | NT  | NR      | NR  | NR  | NT  | PNA, Thrush                | RAG1; NR                        |
| 8                 | M      | 194        | Middle Eastern   | 1634                   | 392  | 180  | 180  | 0       | 1095     | NT  | 93      | 0   | 0   | 0%  | RSV, H. flu                | RAG1; g.1455C>T                 |
| 9                 | M      | 0          | Caucasian        | 690                    | 18   | 16   | 2    | 2       | 667      | 0%  | NT      | 0   | NT  | 0%  | Family History             | RAG1; c.1303A>G                 |
| 10                | M      | 0          | Asian            | 950                    | 304  | 133  | 152  | 38      | 504      | NT  | NR      | NR  | NR  | 0%  | Family History             | RAG1; NR                        |
| 11                | F      | 63         | Caucasian        | 38                     | 7    | 7    | 0    | 26      | 5        | 0%  | 190     | NT  | NT  | +   | CMV                        | Artemis: Exon1del + Exons1-3del |
| 12                | F      | 141        | Middle Eastern   | 1000                   | 0    | 0    | 0    | 0       | 980      | 0%  | 490     | 0   | 0   | 0%  | PCP                        | Unknown                         |
| 13                | M      | 150        | Caucasian        | 400                    | 90   | 47   | 47   | 20      | 300      | NT  | 220     | 42  | 25  | 75% | Diarrhea                   | Unknown                         |
| 14                | F      | 125        | Caucasian        | 360                    | 133  | 86   | 32   | 58      | 166      | 0%  | NR      | NR  | NR  | +   | NR                         | Unknown                         |
| 15                | M      | 110        | Caucasian        | 140                    | 34   | 25   | 9    | 46      | 57       | 1%  | 179     | 8   | 287 | NT  | Family History             | Unknown                         |
| 16                | M      | 851        | Middle Eastern   | 1376                   | 248  | 179  | 69   | 757     | 248      | 60% | NT      | 7   | 0   | 0%  | Enterovirus, BCG, Crypto   | Unknown                         |
| 17                | F      | 106        | Asian            | 390                    | 70   | 60   | 10   | 120     | 250      | 0%  | NR      | NR  | NR  | 0%  | FluA, Rota                 | Unknown                         |
| 18                | M      | 6          | Asian            | 2610                   | 310  | 210  | 30   | 1440    | 780      | 0%  | NR      | NR  | NR  | +   | Family History             | Unknown                         |
| 19                | M      | 510        | Middle Eastern   | 2401                   | 432  | 120  | 192  | 624     | 1200     | 8%  | NT      | 36  | 13  | 0%  | Bronchitis                 | Unknown                         |
| 20                | F      | 15         | Asian            | 1630                   | 410  | 310  | 70   | 330     | 820      | 0%  | NR      | NR  | NR  | NT  | Family History, Omenn      | Unknown                         |

ADA, adenosine deaminase; ALC, absolute lymphocyte count; NK, Natural Killer; PHA, phytohemagglutinin; TME, transplacental maternal engraftment; HSV, herpes simplex virus; PCP, Pneumocystis jiroveci; PNA, pneumonia; VZV, varicella zoster virus; RSV, respiratory syncytial virus; CMV, cytomegalovirus; NT, not tested; NR, not reported

**SUPPLEMENTARY TABLE IIb: Individual HCT characteristics for patients undergoing MSD HCT**

| Case #                       | Year of HCT | Days from diagnosis | Serotherapy dose (mg/kg) | GVHD Prophylaxis | Source | Matching   | TNC (x 10 <sup>8</sup> /kg) | CD34 (x 10 <sup>6</sup> /kg) | CD3 (x 10 <sup>7</sup> /kg) | aGVHD     | cGVHD | 2nd HCT     | Alive | Cause of Death             |
|------------------------------|-------------|---------------------|--------------------------|------------------|--------|------------|-----------------------------|------------------------------|-----------------------------|-----------|-------|-------------|-------|----------------------------|
| <b>IL2RG &amp; JAK3 SCID</b> |             |                     |                          |                  |        |            |                             |                              |                             |           |       |             |       |                            |
| 1                            | 1993        | 3                   | None                     | None             | BM     | 6/6        | 10.7                        | NT                           | NT                          | 0         | N     | N           | Y     |                            |
| 2                            | 1994        | 11                  | None                     | None             | BM     | 8/8        | 9                           | NT                           | NT                          | Grade I   | N     | N           | Y     |                            |
| 3                            | 1995        | 36                  | None                     | None             | BM     | 8/8        | 3.3                         | NT                           | NT                          | Grade II  | N     | N           | Y     |                            |
| 4                            | 1998        | 1                   | None                     | None             | BM     | 6/6        | 3.5                         | 4.9                          | 0.1                         | 0         | N     | N           | Y     |                            |
| 5                            | 2000        | 153                 | None                     | None             | BM     | 6/6        | NT                          | NT                           | NT                          | Grade I   | N     | N           | Y     |                            |
| 6                            | 2000        | 43                  | None                     | CSA/Steroids     | UCB    | 6/6        | 10.3                        | 5.4                          | NT                          | Grade I   | N     | N           | Y     |                            |
| 7                            | 2001        | 23                  | None                     | None             | BM     | 10/10      | 4.9                         | 10.7                         | 0.5                         | Grade II  | N     | N           | Y     |                            |
| 8                            | 2001        | 14                  | None                     | TCD              | BM     | 8/8        | 2.2                         | 8.2                          | 0.3                         | 0         | N     | N           | Y     |                            |
| 9                            | 2002        | 30                  | None                     | TCD              | BM     | 10/10      | 14                          | 13                           | 0.5                         | 0         | N     | N           | Y     |                            |
| 10                           | 2002        | 17                  | None                     | None             | BM     | 6/6        | NT                          | 10.7                         | 3.8                         | Grade II  | N     | N           | Y     |                            |
| 11                           | 2002        | 17                  | None                     | None             | BM     | 6/6        | NT                          | 9.8                          | 3.5                         | 0         | N     | N           | Y     |                            |
| 12                           | 2003        | 15                  | None                     | None             | BM     | 6/6        | NT                          | 11.4                         | 9.5                         | 0         | N     | N           | Y     |                            |
| 13                           | 2004        | 16                  | None                     | TCD              | BM     | 10/10      | 8                           | 4.6                          | 1.8                         | Grade II  | N     | N           | Y     |                            |
| 14                           | 2004        | 24                  | None                     | None             | UCB    | 5/6 (A)    | 23.2                        | 9.7                          | NT                          | Grade III | Y     | N           | N     | cGVHD & RSV (Day +362)     |
| 15                           | 2007        | 55                  | None                     | None             | BM     | 6/6        | 7.5                         | 8.4                          | 7                           | Grade III | Y     | N           | Y     |                            |
| 16                           | 2009        | 74                  | None                     | None             | BM     | 10/10      | 4                           | 3.3                          | NT                          | 0         | N     | N           | Y     |                            |
| 17                           | 2009        | 20                  | None                     | TCD              | BM     | 12/12      | 6.3                         | 6.5                          | 8.8                         | 0         | N     | N           | Y     |                            |
| 18                           | 2010        | 17                  | None                     | CSA              | BM     | 12/12      | 5                           | 7.1                          | 1.7                         | 0         | N     | N           | Y     |                            |
| 19                           | 2012        | 34                  | None                     | CSA              | BM     | 11/12 (DP) | 2.6                         | 9.3                          | 5.5                         | Grade II  | N     | N           | Y     |                            |
| 20                           | 2012        | 18                  | None                     | None             | BM     | 10/10      | 5.4                         | 16.3                         | 6.5                         | NE        | NE    | Full (D+23) | Y     |                            |
| 21                           | 1996        | 61                  | None                     | None             | BM     | 10/10      | 4.9                         | NT                           | NT                          | Grade I   | N     | N           | Y     |                            |
| 22                           | 1996        | 61                  | None                     | None             | BM     | 6/6        | 5.1                         | NT                           | NT                          | Grade II  | N     | N           | Y     |                            |
| 23                           | 2009        | 47                  | None                     | None             | BM     | 10/10      | 2.4                         | 7.7                          | 0.2                         | 0         | N     | N           | N     | Probable Sepsis (Day +928) |

| Case #          | Year of HCT | Days from diagnosis | Serotherapy dose (mg/kg) | GVHD Prophylaxis | Source | Matching | TNC (x 10 <sup>8</sup> /kg) | CD34 (x 10 <sup>6</sup> /kg) | CD3 (x 10 <sup>7</sup> /kg) | aGVHD     | cGVHD | 2nd HCT       | Alive | Cause of Death     |
|-----------------|-------------|---------------------|--------------------------|------------------|--------|----------|-----------------------------|------------------------------|-----------------------------|-----------|-------|---------------|-------|--------------------|
| <b>ADA SCID</b> |             |                     |                          |                  |        |          |                             |                              |                             |           |       |               |       |                    |
| 1               | 1993        | 14                  | None                     | None             | BM     | 6/6      | NT                          | NT                           | NT                          | 0         | N     | N             | Y     |                    |
| 2               | 1994        | 86                  | None                     | None             | BM     | 6/6      | NT                          | NT                           | NT                          | 0         | NE    | N             | N     | Metabolic (Day+96) |
| 3               | 1994        | 14                  | None                     | None             | BM     | 6/6      | NT                          | NT                           | NT                          | 0         | N     | N             | Y     |                    |
| 4               | 1995        | 121 <sup>^</sup>    | None                     | None             | BM     | 6/6      | NT                          | NT                           | NT                          | 0         | N     | N             | Y     |                    |
| 5               | 1996        | 195 <sup>^</sup>    | None                     | None             | BM     | 6/6      | NT                          | NT                           | NT                          | 0         | N     | N             | Y     |                    |
| 6               | 1998        | 386 <sup>^</sup>    | None                     | CSA              | BM     | 6/6      | 5                           | NT                           | NT                          | 0         | N     | N             | Y     |                    |
| 7               | 1998        | 19                  | None                     | None             | BM     | 10/10    | 10                          | NT                           | NT                          | Grade II  | N     | N             | Y     |                    |
| 8               | 1999        | 32                  | None                     | None             | BM     | 10/10    | 5                           | NT                           | NT                          | 0         | N     | N             | Y     |                    |
| 9               | 1999        | 12                  | None                     | None             | BM     | 10/10    | 6.8                         | 11.4                         | 8.3                         | Grade I   | N     | N             | Y     |                    |
| 10              | 1999        | 24                  | None                     | None             | BM     | 6/6      | NT                          | NT                           | NT                          | 0         | N     | N             | Y     |                    |
| 11              | 2001        | 15                  | None                     | None             | BM     | 6/6      | NT                          | NT                           | NT                          | NE        | NE    | NA            | N     | CMV (Day +16)      |
| 12              | 2002        | 26 <sup>^</sup>     | None                     | CSA              | BM     | 6/6      | NT                          | NT                           | NT                          | Grade III | N     | N             | Y     |                    |
| 13              | 2002        | 30                  | None                     | None             | BM     | 10/10    | 2                           | 2.92                         | 1                           | Grade I   | N     | Full (D+2310) | Y     |                    |
| 14              | 2002        | 18                  | None                     | None             | BM     | 8/8      | 12.6                        | 5                            | NT                          | 0         | N     | N             | Y     |                    |
| 15              | 2004        | 45                  | None                     | None             | BM     | 10/10    | NT                          | NT                           | NT                          | Grade II  | N     | N             | Y     |                    |
| 16              | 2006        | 21                  | None                     | None             | BM     | 10/10    | NT                          | NT                           | NT                          | Grade II  | N     | Boost (D+343) | Y     |                    |
| 17              | 2006        | 65                  | None                     | CSA              | BM     | 10/10    | NT                          | NT                           | NT                          | 0         | N     | N             | Y     |                    |
| 18              | 2007        | 30                  | None                     | None             | BM     | 10/10    | NT                          | NT                           | NT                          | 0         | N     | N             | Y     |                    |
| 19              | 2007        | 38                  | None                     | None             | BM     | 10/10    | 6.2                         | 2.5                          | NT                          | 0         | N     | Boost (D+237) | Y     |                    |
| 20              | 2008        | 279 <sup>^</sup>    | None                     | CSA              | BM     | 10/10    | NT                          | NT                           | NT                          | 0         | N     | Boost (D+211) | Y     |                    |
| 21              | 2009        | 30                  | None                     | None             | BM     | 10/10    | 4.4                         | NT                           | NT                          | Grade I   | N     | N             | Y     |                    |
| 22              | 2010        | 37 <sup>^</sup>     | None                     | CSA              | BM     | 12/12    | 5.6                         | 7.2                          | 2.4                         | Grade II  | N     | N             | Y     |                    |
| 23              | 2011        | 37 <sup>^</sup>     | None                     | CSA              | BM     | 12/12    | 3                           | 10                           | 3.1                         | 0         | N     | N             | Y     |                    |

| Case #            | Year of HCT | Days from diagnosis | Serotherapy dose (mg/kg) | GVHD Prophylaxis | Source | Matching | TNC (x 10 <sup>8</sup> /kg) | CD34 (x 10 <sup>6</sup> /kg) | CD3 (x 10 <sup>7</sup> /kg) | aGVHD    | cGVHD | 2nd HCT        | Alive | Cause of Death      |
|-------------------|-------------|---------------------|--------------------------|------------------|--------|----------|-----------------------------|------------------------------|-----------------------------|----------|-------|----------------|-------|---------------------|
| <b>Other SCID</b> |             |                     |                          |                  |        |          |                             |                              |                             |          |       |                |       |                     |
| 1                 | 1998        | 13                  | None                     | CSA/MTX          | BM     | 6/6      | 11.8                        | NT                           | NT                          | 0        | N     | N              | Y     |                     |
| 2                 | 1998        | 17                  | None                     | CSA/MTX          | BM     | 6/6      | 7.3                         | NT                           | NT                          | 0        | N     | N              | Y     |                     |
| 3                 | 1999        | 19                  | None                     | CSA/Steroids     | BM     | 6/6      | 6                           | NT                           | NT                          | 0        | N     | N              | Y     |                     |
| 4                 | 2002        | 12                  | None                     | TCD              | BM     | 8/8      | 0.7                         | 0.8                          | 0.02                        | 0        | Y     | Boost (D+586)  | Y     |                     |
| 5                 | 2002        | 35                  | None                     | CSA              | BM     | 12/12    | 12                          | 16                           | 31.7                        | 0        | N     | N              | Y     |                     |
| 6                 | 2004        | 20                  | None                     | None             | BM     | 10/10    | 7.2                         | 5.6                          | 29                          | 0        | N     | N              | Y     |                     |
| 7                 | 2005        | 29                  | None                     | None             | BM     | 10/10    | 6.9                         | 14.8                         | NT                          | 0        | N     | Boost (D+2311) | Y     |                     |
| 8                 | 2006        | 87                  | None                     | CSA              | BM     | 5/6 (A)  | 4.4                         | NT                           | NT                          | 0        | NE    | Full (D+89)    | Y     |                     |
| 9                 | 2007        | 15                  | None                     | CSA/MTX          | BM     | 10/10    | 7.5                         | 29.1                         | 9                           | 0        | N     | N              | Y     |                     |
| 10                | 2010        | 41                  | None                     | None             | BM     | 10/10    | 8.6                         | 18.4                         | 4.4                         | 0        | N     | Full (D+837)   | N     | Unknown (Day +1002) |
| 11                | 2011        | 64                  | Campath/1.2              | None             | BM     | 10/10    | 1.4                         | 8.3                          | 1.12                        | 0        | N     | Boost (D+71)   | Y     |                     |
| 12                | 1998        | 25                  | None                     | None             | BM     | 6/6      | NT                          | 7.3                          | NT                          | 0        | N     | N              | Y     |                     |
| 13                | 1998        | 56                  | None                     | CSA/MTX          | BM     | 6/6      | 2                           | NT                           | NT                          | 0        | N     | N              | Y     |                     |
| 14                | 2000        | 12                  | None                     | CSA              | BM     | 6/6      | NT                          | NT                           | NT                          | 0        | N     | N              | Y     |                     |
| 15                | 2000        | 18                  | hATG/90                  | CSA              | BM     | 6/6      | 6.9                         | 9.9                          | NT                          | 0        | N     | N              | Y     |                     |
| 16                | 2002        | 1389                | None                     | None             | BM     | 8/8      | 10                          | NT                           | NT                          | 0        | N     | N              | Y     |                     |
| 17                | 2004        | 40                  | None                     | CSA/MMF          | BM     | 10/10    | NT                          | 3.6                          | 11.8                        | 0        | N     | N              | Y     |                     |
| 18                | 2005        | 47                  | None                     | None             | BM     | 10/10    | NT                          | NT                           | NT                          | Grade II | N     | N              | N     | Unknown (Day +1916) |
| 19                | 2006        | 160                 | None                     | None             | BM     | 10/10    | 1.8                         | NT                           | NT                          | 0        | N     | N              | Y     |                     |
| 20                | 2010        | 60                  | None                     | CSA              | BM     | 10/10    | NT                          | 8.5                          | 5.6                         | 0        | N     | N              | Y     |                     |

<sup>^</sup>PEG-ADA pre-HCT; TNC, total nucleated cell; rATG, rabbit antithymocyte globulin; hATG, horse ATG; \*Fresenius; CSA, cyclosporine; MTX, methotrexate; MMF, mycophenolate mofetil; TCD, T cell depletion; BM, bone marrow; UCB, umbilical cord blood; CMV, cytomegalovirus; NE, not evaluable

SUPPLEMENTARY TABLE IIc: Individual immunologic data at 1 year post MSD HCT

| Case #                       | ALC                    | CD3         | CD4         | CD8         | B Cells     | NK Cells   | CD4 / CD45RA | PHA       | IgG        | IgM       | IgA       | On IG    |
|------------------------------|------------------------|-------------|-------------|-------------|-------------|------------|--------------|-----------|------------|-----------|-----------|----------|
|                              | (x 10 <sup>6</sup> /L) |             |             |             |             |            |              |           | (mg/dL)    |           |           |          |
| <b>IL2RG &amp; JAK3 SCID</b> |                        |             |             |             |             |            |              |           |            |           |           |          |
| 1                            | NT                     | NT          | NT          | NT          | NT          | NT         | NT           | NT        | NT         | NT        | NT        | NR       |
| 2                            | 6142                   | 4361        | 2580        | 1167        | 1536        | 553        | NT           | NT        | 610        | 40        | 10        | N        |
| 3                            | 4736                   | 3078        | 2179        | 758         | 1373        | 142        | NT           | NT        | 300        | 61        | 51        | N        |
| 4                            | NR                     | 4140        | 1783        | NR          | NR          | NR         | NR           | NR        | NR         | NR        | NR        | N        |
| 5                            | NR                     | 3040        | 1820        | NR          | NR          | NR         | NR           | NR        | NR         | NR        | NR        | N        |
| 6                            | 2335                   | 1751        | 1191        | 444         | 537         | 47         | NT           | 8%        | NT         | 29        | 7         | Y        |
| 7                            | 4720                   | 2440        | 1460        | 850         | 2020        | 210        | NT           | 100%      | 550        | 28        | 0         | Y        |
| 8                            | 6180                   | 3955        | 2559        | 1267        | 2126        | 80         | 78%          | 99%       | 514        | 103       | 114       | N        |
| 9                            | NT                     | NT          | NT          | NT          | NT          | NT         | NT           | NT        | NT         | NT        | NT        | NR       |
| 10                           | 5690                   | 3700        | 2110        | 1480        | 1710        | 170        | NR           | NR        | NR         | NR        | NR        | N        |
| 11                           | 7270                   | 4940        | 2620        | 2250        | 1890        | 220        | NR           | NR        | NR         | NR        | NR        | N        |
| 12                           | 5480                   | 4270        | 1750        | 2300        | 1100        | 50         | NR           | NR        | NR         | NR        | NR        | N        |
| 13                           | 4248                   | 3428        | 2014        | 1160        | 599         | 115        | 55%          | 59%       | 605        | 67        | 9         | N        |
| 15                           | 2810                   | 2390        | 1210        | 1180        | 30          | 280        | NR           | NR        | NR         | NR        | NR        | N        |
| 16                           | 5600                   | 3500        | 1600        | 1600        | 1200        | 170        | 75%          | NT        | 580        | 85        | 34        | N        |
| 17                           | 6100                   | 3390        | 1646        | 1451        | 2571        | 93         | 21%          | NT        | 1150       | 22        | 13        | Y        |
| 18                           | 2390                   | 1769        | 921         | 824         | 561         | 47         | 33%          | NT        | 820        | 27        | 12        | Y        |
| 19                           | 2200                   | 1981        | 1083        | 793         | 83          | 52         | 42%          | NT        | 600        | 7         | 4         | Y        |
| <b>20</b>                    | <b>5375</b>            | <b>2956</b> | <b>1827</b> | <b>1075</b> | <b>2150</b> | <b>161</b> | <b>74%</b>   | <b>NT</b> | <b>610</b> | <b>72</b> | <b>17</b> | <b>N</b> |
| 21                           | 10449                  | 9287        | 2653        | 6302        | 1879        | 221        | 17%          | NT        | 1750       | 116       | 21        | N        |
| 22                           | 4736                   | 3680        | 1766        | 2012        | 834         | 392        | 20%          | NT        | 1380       | 128       | 97        | N        |
| 23                           | 2456                   | 1966        | 1025        | 889         | 423         | 57         | 26%          | NT        | 870        | 68        | 44        | Y        |

| Case #          | ALC                    | CD3  | CD4  | CD8  | B Cells | NK Cells | CD4 / CD45RA | PHA  | IgG     | IgM | IgA | On IG |
|-----------------|------------------------|------|------|------|---------|----------|--------------|------|---------|-----|-----|-------|
|                 | (x 10 <sup>6</sup> /L) |      |      |      |         |          |              |      | (mg/dL) |     |     |       |
| <b>ADA SCID</b> |                        |      |      |      |         |          |              |      |         |     |     |       |
| 1               | NR                     | 1008 | 405  | NR   | NR      | NR       | NR           | NR   | NR      | NR  | NR  | N     |
| 3               | NR                     | 1659 | NR   | NR   | NR      | NR       | NR           | NR   | NR      | NR  | NR  | N     |
| 4               | NR                     | 1279 | 570  | NR   | NR      | NR       | NR           | NR   | NR      | NR  | NR  | N     |
| 5               | NR                     | 2030 | 577  | NR   | NR      | NR       | NR           | NR   | NR      | NR  | NR  | N     |
| 6               | 1780                   | 1246 | 463  | 694  | 249     | 231      | NT           | 100% | NT      | 99  | 14  | N     |
| 7               | 2000                   | 1274 | 404  | 626  | 14      | 97       | NT           | NT   | 1050    | 30  | 0   | Y     |
| 8               | 1960                   | 1814 | 716  | 1114 | 144     | 82       | NT           | NT   | 800     | 101 | 45  | N     |
| 9               | 2582                   | 1764 | 593  | 958  | 333     | 358      | NT           | NT   | 397     | 33  | 17  | N     |
| 10              | NR                     | 2360 | 368  | NR   | NR      | NR       | NR           | NR   | NR      | NR  | NR  | N     |
| 12              | NR                     | 760  | 240  | NR   | NR      | NR       | NR           | NR   | NR      | NR  | NR  | N     |
| 13              | 400                    | 364  | 132  | 214  | 9       | 20       | 7%           | NT   | 893     | 36  | 25  | Y     |
| 14              | 1824                   | 985  | 383  | 474  | 73      | 602      | 22%          | 58%  | 520     | 52  | 14  | N     |
| 15              | 620                    | 500  | 250  | 240  | 40      | 20       | NR           | NR   | NR      | NR  | NR  | N     |
| 16              | 810                    | 640  | 280  | 370  | 30      | 40       | NR           | NR   | NR      | NR  | NR  | N     |
| 17              | NR                     | 730  | 330  | NR   | NR      | NR       | NR           | NR   | NR      | NR  | NR  | N     |
| 18              | NR                     | 2500 | 1330 | NR   | NR      | NR       | NR           | NR   | NR      | NR  | NR  | N     |
| 19              | 800                    | 730  | 460  | 250  | 50      | 20       | NT           | NT   | 721     | 24  | 15  | Y     |
| 20              | 620                    | 520  | 240  | 240  | 30      | 10       | NR           | NR   | NR      | NR  | NR  | N     |
| 21              | 864                    | 597  | 280  | 257  | 106     | 84       | 20%          | 76%  | 793     | 133 | 31  | N     |
| 22              | 974                    | 772  | 510  | 194  | 157     | 30       | 3%           | NT   | 810     | 0   | 23  | Y     |
| 23              | 2322                   | 2256 | 1214 | 851  | 47      | 0        | NT           | NT   | 890     | 13  | 0   | Y     |

| Case #            | ALC                    | CD3         | CD4        | CD8        | B Cells     | NK Cells   | CD4 / CD45RA | PHA        | IgG        | IgM       | IgA       | On IG    |
|-------------------|------------------------|-------------|------------|------------|-------------|------------|--------------|------------|------------|-----------|-----------|----------|
|                   | (x 10 <sup>6</sup> /L) |             |            |            |             |            |              |            | (mg/dL)    |           |           |          |
| <b>Other SCID</b> |                        |             |            |            |             |            |              |            |            |           |           |          |
| 1                 | 1560                   | 744         | 450        | 248        | 0           | 682        | NT           | 100%       | NT         | 29        | 45        | Y        |
| 2                 | 470                    | 244         | 103        | 141        | 5           | 174        | NT           | 46%        | NT         | 11        | 0         | Y        |
| 3                 | 488                    | 326         | 189        | 122        | 4           | 158        | NT           | 31%        | NT         | NT        | NT        | Y        |
| 4                 | 468                    | 27          | 17         | 8          | 0           | 400        | NT           | 49%        | NT         | 8         | 115       | Y        |
| 5                 | 9043                   | 8157        | 1559       | 6646       | 0           | 804        | 1%           | NT         | 843        | 11        | 16        | Y        |
| 6                 | 936                    | 743         | 278        | 348        | 0           | 187        | 4%           | 100%       | 854        | 17        | 14        | Y        |
| 7                 | NR                     | 160         | 80         | NR         | NR          | NR         | NR           | NR         | NR         | NR        | NR        | Y        |
| 8                 | <b>4180</b>            | <b>1463</b> | <b>502</b> | <b>794</b> | <b>2132</b> | <b>543</b> | <b>39%</b>   | <b>43%</b> | <b>800</b> | <b>91</b> | <b>67</b> | <b>N</b> |
| 9                 | 590                    | 354         | 136        | 212        | 12          | 207        | NT           | 31%        | NT         | 21        | NT        | Y        |
| 10                | 480                    | 250         | 100        | 50         | 0           | 230        | NR           | NR         | NR         | NR        | NR        | NR       |
| 11                | NT                     | NT          | NT         | NT         | 747         | NT         | NT           | NT         | NT         | NT        | NT        | N        |
| 12                | 1500                   | 1020        | 290        | 770        | 30          | 470        | NT           | NT         | 644        | 44        | 23        | N        |
| 13                | 600                    | 490         | 330        | 140        | 0           | 90         | NT           | NT         | 720        | 49        | 0         | Y        |
| 14                | NR                     | 2250        | 1460       | NR         | NR          | NR         | NR           | NR         | NR         | NR        | NR        | N        |
| 15                | 2835                   | NT          | NT         | NT         | NT          | NT         | NT           | NT         | 372        | 59        | 85        | N        |
| 16                | 1558                   | 997         | 374        | 608        | 374         | 125        | 12%          | 16%        | 1010       | 26        | 32        | N        |
| 17                | 2630                   | 2000        | 950        | 1000       | 260         | 290        | NR           | NR         | NR         | NR        | NR        | N        |
| 18                | NR                     | 1800        | 520        | NR         | NR          | NR         | NR           | NR         | NR         | NR        | NR        | NR       |
| 19                | 7700                   | 5698        | 3773       | 1309       | 1155        | 616        | 82%          | 97%        | 960        | 191       | 282       | N        |
| 20                | 2170                   | 1320        | 630        | 520        | 330         | 350        | NR           | NR         | NR         | NR        | NR        | N        |

***Bold Italics: After Conditioned 2nd HCT (Not counted in Table IV)***

ALC, absolute lymphocyte count; NK, natural killer; PHA, phytohemagglutinin; IG, immunoglobulin; NT, not tested



SUPPLEMENTARY TABLE IId: Individual immunologic data at last follow-up post MSD HCT

| Case #            | ALC                    | CD3         | CD4         | CD8         | B Cells     | NK Cells   | CD4 / CD45RA | PHA       | IgG        | IgM       | IgA       | On IG    | PBMC        | CD3         | B Cell      | Myeloid     | Other Complications      |
|-------------------|------------------------|-------------|-------------|-------------|-------------|------------|--------------|-----------|------------|-----------|-----------|----------|-------------|-------------|-------------|-------------|--------------------------|
|                   | (x 10 <sup>6</sup> /L) |             |             |             |             |            |              |           | (mg/dL)    |           |           |          | Chimerism   |             |             |             |                          |
| <b>IL2RG SCID</b> |                        |             |             |             |             |            |              |           |            |           |           |          |             |             |             |             |                          |
| 1                 | 3172                   | 2632        | 1586        | 856         | 347         | 95         | 70%          | NT        | 1540       | 200       | 170       | N        | NT          | NT          | NT          | NT          | Warts                    |
| 2                 | 3608                   | 2417        | 1335        | 938         | 1010        | 0          | 54%          | 66%       | 470        | 26        | 80        | N        | NT          | 100%        | NT          | 0%          | None                     |
| 3                 | 2162                   | 1578        | 713         | 735         | 454         | 65         | 65%          | 100%      | 740        | 51        | 89        | N        | NT          | NT          | NT          | NT          | None                     |
| 4                 | NT                     | 1650        | 470         | NR          | NR          | NR         | NR           | 100%      | NR         | NR        | NR        | N        | 52%         | NR          | NR          | NR          | Warts                    |
| 5                 | 2710                   | 2220        | 1270        | NR          | 330         | 80         | NR           | 100%      | NR         | NR        | NR        | N        | 34%         | 100%        | 5%          | 0%          | None                     |
| 6                 | 2700                   | 1930        | 1360        | 550         | 460         | 0          | NT           | 74%       | NT         | 29        | 7         | Y        | NT          | NT          | NT          | NT          | None                     |
| 7                 | 2383                   | 1890        | 1113        | 727         | 419         | 62         | NT           | 100%      | 921        | 107       | 169       | N        | 5%          | 99%         | 6%          | NT          | BCG, Immune Pancytopenia |
| 8                 | 3750                   | 3116        | 1616        | 1297        | 589         | 128        | 67%          | 100%      | 1080       | 95        | 206       | N        | NT          | NT          | 11%         | NT          | Transaminitis            |
| 9                 | 1520                   | 1190        | 458         | 468         | 248         | 33         | 73%          | 100%      | 743        | 57        | 155       | N        | NT          | NT          | 29%         | NT          | None                     |
| 10                | 2200                   | 1690        | 700         | NR          | 350         | 90         | NR           | 100%      | NR         | NR        | NR        | N        | 33%         | 100%        | 0%          | 0%          | None                     |
| 11                | 2250                   | 1600        | 540         | NR          | 450         | 140        | NR           | 100%      | NR         | NR        | NR        | N        | 44%         | 100%        | 0%          | 0%          | NR                       |
| 12                | 2840                   | 2240        | 850         | NR          | 430         | NR         | NR           | 100%      | NR         | NR        | NR        | N        | 67%         | 100%        | 0%          | 0%          | None                     |
| 13                | 4950                   | 4069        | 1752        | 1284        | 822         | 149        | 73%          | 100%      | 604        | 41        | 6         | N        | NT          | NT          | 18%         | NT          | Transaminitis            |
| 15                | 3590                   | 2960        | 1500        | NR          | 790         | 160        | NR           | NR        | NR         | NR        | NR        | N        | 30%         | 100%        | 18%         | NR          | None                     |
| 16                | 6000                   | 4300        | 1800        | 2100        | 1200        | 380        | 80%          | NT        | 810        | 190       | 60        | N        | 64%         | NT          | NT          | 3%          | None                     |
| 17                | 5266                   | 3650        | 1837        | 1358        | 1566        | 0          | 28%          | NT        | 920        | 33        | 27        | Y        | NT          | 99%         | 4%          | 1%          | None                     |
| 18                | 2977                   | 1901        | 836         | 1026        | 989         | 37         | 16%          | NT        | 770        | 33        | 41        | Y        | NT          | 94%         | 0%          | 0%          | None                     |
| 19                | 2200                   | 1981        | 1083        | 793         | 83          | 52         | 42%          | NT        | 600        | 7         | 4         | Y        | NT          | 100%        | NT          | 0%          | CMV Pneumonitis          |
| <b>20</b>         | <b>5375</b>            | <b>2956</b> | <b>1827</b> | <b>1075</b> | <b>2150</b> | <b>161</b> | <b>74%</b>   | <b>NT</b> | <b>610</b> | <b>72</b> | <b>17</b> | <b>N</b> | <b>100%</b> | <b>100%</b> | <b>100%</b> | <b>100%</b> | <b>None</b>              |
| 21                | 10449                  | 9287        | 2653        | 6302        | 1879        | 221        | 17%          | NT        | 1750       | 116       | 21        | N        | 50%         | 90%         | 10%         | 50%         | Engraftment Syndrome     |
| 22                | 4736                   | 3680        | 1766        | 2012        | 834         | 392        | 20%          | NT        | 1380       | 128       | 97        | N        | NT          | 80%         | 10%         | 10%         | Engraftment Syndrome     |

| Case #          | ALC                    | CD3        | CD4        | CD8        | B Cells   | NK Cells  | CD4 / CD45RA | PHA       | IgG        | IgM       | IgA       | On IG    | PBMC      | CD3       | B Cell    | Myeloid   | Other Complications |
|-----------------|------------------------|------------|------------|------------|-----------|-----------|--------------|-----------|------------|-----------|-----------|----------|-----------|-----------|-----------|-----------|---------------------|
|                 | (x 10 <sup>6</sup> /L) |            |            |            |           |           |              |           | (mg/dL)    |           |           |          | Chimerism |           |           |           |                     |
| <b>ADA SCID</b> |                        |            |            |            |           |           |              |           |            |           |           |          |           |           |           |           |                     |
| 1               | NR                     | NR         | 1452       | 1280       | NR        | 33        | NR           | NR        | NR         | NR        | NR        | N        | 14%       | NR        | NR        | NR        | None                |
| 3               | NR                     | 2760       | 1630       | 1050       | 580       | 470       | NR           | 100%      | NR         | NR        | NR        | N        | 45%       | 100%      |           | 34%       | NR                  |
| 4               | NR                     | 2140       | 1630       | 660        | 110       | 340       | NR           | 100%      | NR         | NR        | NR        | N        | 60%       | NR        | NR        | NR        | NR                  |
| 5               | NR                     | 4440       | 3330       | 2040       | 750       | 220       | NR           | 100%      | NR         | NR        | NR        | N        | 23%       | 100%      | 54%       | 0%        | NR                  |
| 6               | 2150                   | 1613       | 796        | 774        | 194       | 301       | NT           | NT        | NT         | 99        | 14        | N        | 53%       | 88%       | 82%       | 22%       | None                |
| 7               | 2169                   | 1886       | 803        | 831        | 213       | 45        | 13%          | NT        | 670        | 61        | 115       | N        | NT        | 92%       | 60%       | 10%       | None                |
| 8               | 1847                   | 1547       | 944        | 493        | 152       | 111       | 2%           | NT        | 890        | 142       | 111       | N        | NT        | 88%       | 26%       | 3%        | None                |
| 9               | 2582                   | 1764       | 593        | 958        | 333       | 358       | NT           | NT        | 397        | 33        | 17        | N        | NT        | NT        | NT        | NT        | Neurologic Damage   |
| 10              | NR                     | 2000       | 1600       | 740        | 180       | 100       | NR           | 100%      | NR         | NR        | NR        | N        | 18%       | 95%       | 30%       | 24%       | NR                  |
| 12              | NR                     | 1720       | 1320       | 600        | 190       | 150       | NR           | NT        | NR         | NR        | NR        | N        | 32%       | 100%      | 59%       | 0%        | NR                  |
| <b>13</b>       | <b>700</b>             | <b>646</b> | <b>273</b> | <b>329</b> | <b>28</b> | <b>21</b> | <b>3%</b>    | <b>NT</b> | <b>894</b> | <b>18</b> | <b>44</b> | <b>N</b> | <b>NT</b> | <b>NT</b> | <b>NT</b> | <b>NT</b> | <b>None</b>         |
| 14              | 2440                   | 1171       | 512        | 561        | 122       | 1025      | 13%          | 46%       | 670        | 49        | 27        | N        | NT        | 100%      | NT        | 0%        | None                |
| 15              | NR                     | 1380       | 1190       | 510        | 100       | 10        | NR           | NT        | NR         | NR        | NR        | N        | 33%       | 100%      | 5%        | 0%        | Hearing Loss        |
| 16              | NR                     | 1370       | 990        | NR         | NR        | NR        | NR           | NR        | NR         | NR        | NR        | N        | NR        | 100%      | 0%        | 0%        | NR                  |
| 17              | NR                     | 600        | 1140       | NR         | NR        | NR        | NR           | NR        | NR         | NR        | NR        | N        | NR        | 100%      | NR        | NR        | NR                  |
| 18              | NR                     | 2390       | 1240       | NR         | NR        | NR        | NR           | NR        | NR         | NR        | NR        | N        | NR        | 84%       | NR        | 5%        | None                |
| 19              | 4300                   | 3830       | 1420       | 1720       | 220       | 220       | NT           | NT        | 667        | 32        | 66        | N        | NT        | 89%       | 35%       | 0%        | Seizures            |
| 20              | NR                     | 1190       | 330        | NR         | NR        | NR        | NR           | NR        | NR         | NR        | NR        | N        | NR        | 100%      | NR        | 0%        | None                |
| 21              | 754                    | 578        | 298        | 170        | 94        | 54        | 17%          | 100%      | 855        | 113       | 51        | N        | NT        | NT        | NT        | NT        | None                |
| 22              | 794                    | 723        | 368        | 220        | 36        | 27        | 6%           | NT        | 470        | 16        | 30        | Y        | NT        | 100%      | 0%        | 0%        | HCM                 |
| 23              | 2572                   | 2459       | 980        | 936        | 78        | 0         | 16%          | NT        | 1060       | 17        | 0         | Y        | NT        | 100%      | NT        | 0%        | None                |

| Case #            | ALC                    | CD3         | CD4         | CD8        | B Cells    | NK Cells   | CD4 / CD45RA | PHA         | IgG        | IgM       | IgA       | On IG    | PBMC        | CD3         | B Cell      | Myeloid     | Other Complications         |
|-------------------|------------------------|-------------|-------------|------------|------------|------------|--------------|-------------|------------|-----------|-----------|----------|-------------|-------------|-------------|-------------|-----------------------------|
|                   | (x 10 <sup>6</sup> /L) |             |             |            |            |            |              |             | (mg/dL)    |           |           |          |             |             |             |             |                             |
| <b>Other SCID</b> |                        |             |             |            |            |            |              |             |            |           |           |          |             |             |             |             |                             |
| 1                 | 2360                   | 1864        | 1109        | 755        | 0          | 472        | 3%           | 95%         | 812        | NT        | NT        | Y        | 8%          | 98%         | NT          | 1%          | Chronic Lung Disease        |
| 2                 | 1940                   | 1397        | 407         | 989        | 0          | 524        | NT           | 47%         | NT         | 7         | 11        | Y        | 28%         | 96%         | NT          | 1%          | None                        |
| 3                 | 540                    | 439         | 248         | 140        | 4          | 81         | NT           | 61%         | NT         | NT        | NT        | Y        | 6%          | 92%         | 7%          | 0%          | None                        |
| 4                 | 720                    | 559         | 305         | 294        | 1          | 37         | 5%           | 86%         | NT         | 0         | 0         | Y        | NT          | NT          | NT          | NT          | None                        |
| 5                 | 2073                   | 1939        | 906         | 1026       | 0          | 128        | 3%           | NT          | 1310       | 0         | 7         | Y        | NT          | 94%         | NT          | 0%          | None                        |
| 6                 | 1051                   | 861         | 492         | 255        | 18         | 161        | 3%           | NT          | 1140       | 18        | 82        | Y        | NT          | 97%         | 0%          | 0%          | None                        |
| 7                 | NR                     | 230         | 140         | NR         | NR         | NR         | NR           | NR          | NR         | NR        | NR        | Y        | NR          | 100%        | NR          | 0%          | NR                          |
| 8                 | <b>3096</b>            | <b>2198</b> | <b>1300</b> | <b>867</b> | <b>279</b> | <b>681</b> | <b>18%</b>   | <b>100%</b> | <b>860</b> | <b>65</b> | <b>81</b> | <b>N</b> | <b>100%</b> | <b>100%</b> | <b>100%</b> | <b>100%</b> | <b>Chronic Lung Disease</b> |
| 9                 | 610                    | 403         | 146         | 256        | 13         | 115        | 20%          | 77%         | 644        | 56        | 66        | N        | 9%          | 90%         | 58%         | 1%          | None                        |
| 11                | 3132                   | 2606        | 1431        | 955        | 395        | 113        | 36%          | 100%        | 1370       | 31        | 33        | N        | NT          | 100%        | 100%        | 63%         | None                        |
| 12                | 1000                   | 480         | 230         | 220        | 170        | 340        | NT           | NT          | 1150       | 40        | 125       | N        | NT          | 98%         | 81%         | NT          | None                        |
| 13                | 1197                   | 728         | 410         | 278        | 87         | 387        | 52%          | NT          | 1270       | 72        | NT        | N        | 37%         | NT          | NT          | 6%          | Hypothyroidism              |
| 14                | 1510                   | 1250        | 690         | NR         | 170        | 50         | NR           | NR          | NR         | NR        | NR        | N        | 35%         | 42%         | NR          | 19%         | NR                          |
| 15                | 1200                   | 1140        | 288         | 588        | 24         | 24         | 16%          | NT          | 375        | 48        | 133       | N        | NT          | 99%         | 57%         | NT          | None                        |
| 16                | 1081                   | 768         | 432         | 313        | 216        | 65         | 4%           | 58%         | 1120       | 34        | 153       | N        | NT          | 95%         | NT          | 2%          | EBV PTLD                    |
| 17                | 1960                   | 1650        | 900         | NR         | 140        | 100        | NR           | 100%        | NR         | NR        | NR        | N        | 52%         | 100%        | NR          | 0%          | NR                          |
| 19                | 3216                   | 2508        | 1640        | 772        | 418        | 225        | 71%          | 100%        | 920        | 138       | 183       | N        | NT          | 100%        | NT          | 0%          | None                        |
| 20                | NR                     | 1890        | 820         | NR         | NR         | NR         | NR           | NR          | NR         | NR        | NR        | N        | NR          | 100%        | NR          | NR          | None                        |

**Bold Italics: After Conditioned 2nd HCT (Not counted in Table IV)**

ALC, absolute lymphocyte count; NK, natural killer; PHA, phytohemagglutinin; IG, immunoglobulin; AIHA, autoimmune hemolytic anemia; AI, autoimmune; FTT, failure to thrive; CMV, cytomegalovirus; EBV, Epstein-Barr virus; NT, not tested

SUPPLEMENTARY TABLE III: Additional Analysis of Risk for Grade  $\geq$ II Acute GVHD

|                                 | MSD         | P value | URD         | P value |
|---------------------------------|-------------|---------|-------------|---------|
| Year of HCT                     |             |         |             |         |
| Before Median                   | 15% (5/34)  |         | 53% (9/17)  |         |
| After Median                    | 31% (9/29)  | 0.14    | 47% (8/17)  | 1       |
| Known HLA-Mismatches            |             |         |             |         |
| Yes                             | 100% (2/2)  |         | 75% (3/4)   |         |
| No                              | 20% (12/61) | 0.05    | 47% (14/30) | 0.6     |
| # of anti-GVHD Agents (non-ATG) |             |         |             |         |
| None                            | 26% (10/39) | 0.36    | 100% (1/1)  | 1       |
| One                             | 25% (3/12)  | 1       | 38% (5/12)  | 0.72    |
| Two                             | 0% (0/7)    | 0.33    | 50% (8/16)  | 1       |
| Three                           | NA          |         | 50% (1/2)   | 1       |
| Ex vivo TCD                     | 20% (1/5)   | 1       | 67% (2/3)   | 1       |

ATG, anti-thymocyte globulin; TCD, T-cell depletion
